# Supplementary material for: The genetic architecture of Alzheimer disease risk in the Ohio and Indiana Amish
Source: bioRxiv or medRxiv preprint supplement (doi:10.1101/2021.07.06.21259932), 2021-07-07

## SUPPLEMENTAL INFORMATION

**Supplemental Table 1. Kinship coefficient of Amish subpopulations by primary recruitment site and cognitive impairment status.**

| Group                 | Mean Kinship Coefficient |
|-----------------------|--------------------------|
| All Amish adults      | 0.003703                 |
| Primary site: Ohio    | 0.006157                 |
| Primary site: Indiana | 0.005290                 |
| Cognitively Normal    | 0.003909                 |
| Cognitively Impaired  | 0.003793                 |

**Supplemental Figure 1. Age distribution of Amish and non-Amish populations.** We observe that the age distributions of the populations are not identical and include many younger individuals, especially in the non-Amish comparison group. This justifies the use of an analysis after age subset in the case of an age-related disease, such as Alzheimer disease.

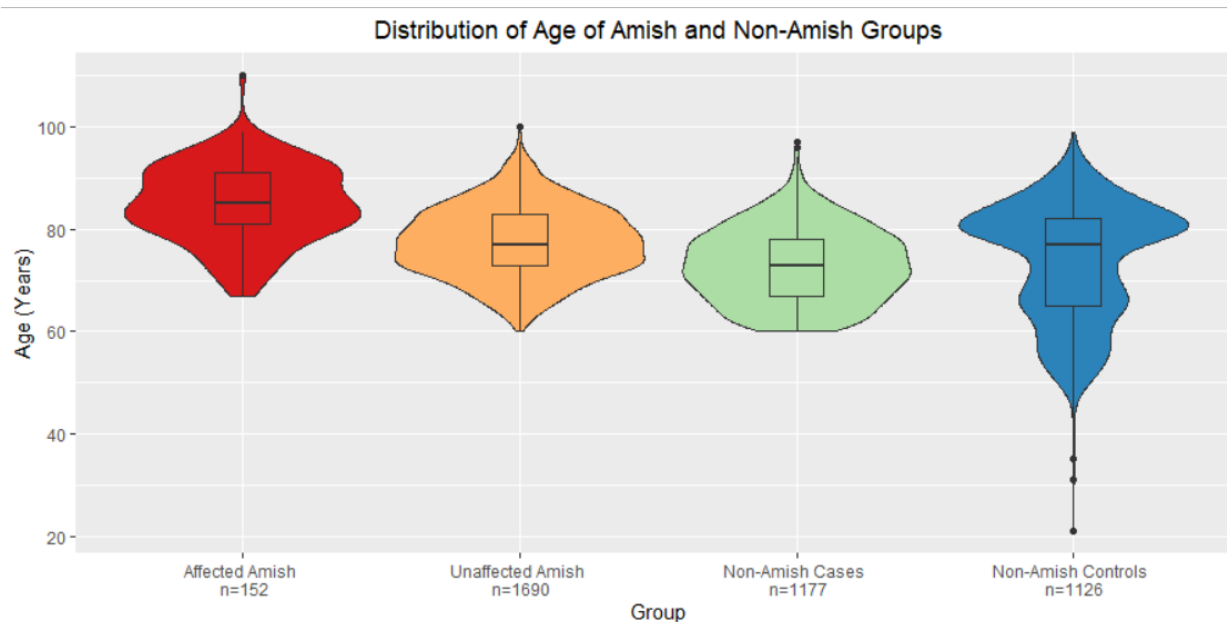

**Supplemental Figure 2. PRS distributions in Amish with cognitive impairment as primary outcome.** We observe that the Jansen et al. (2019)<sup>17</sup> polygenic risk score is capable of distinguishing between Amish affected by cognitive impairment and unaffected by cognitive impairment ( $p=0.002$ ). *Abbreviations: CI = cognitively impaired.*

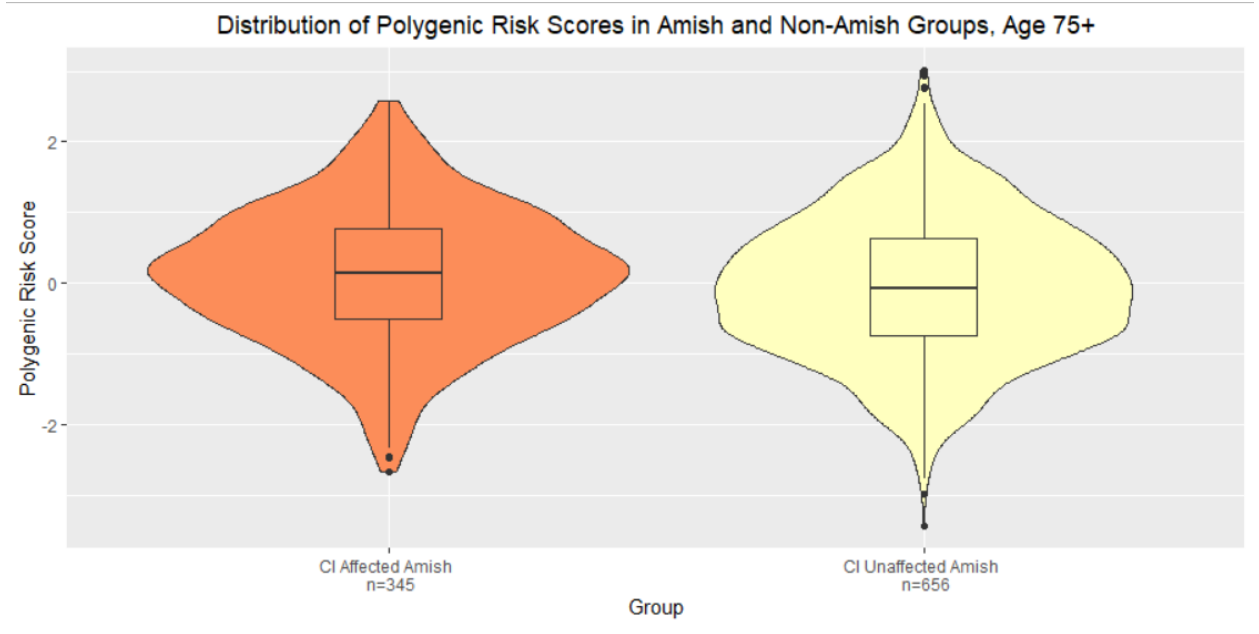

Supplement: Supplementary file [file media-1.pdf]
